# Supplementary material for: Transcriptome maps of general eukaryotic RNA degradation factors
Source: eLife. 2019 May 28;8:e47040. doi: 10.7554/eLife.47040 (PMC6570525; doi:10.7554/eLife.47040)
Supplement: Supplementary file 1. [file elife-47040-supp1.xlsx]

## Sheet: Supplement
Pathway	Factor	Details	High confidence cross-link sites	Source	Accession number
Surveillance	Nrd1	Nrd1/Nab3 complex	187164	Schulz et al., 2013	﻿ArrayExpress: E-MTAB-1766
	Nab3		91762	Schulz et al., 2013	﻿ArrayExpress: E-MTAB-1766
Cap binding complex	Cbc2		95530	Baejen et al., 2014	GEO: ﻿GSE59676
Elongation	Bur1	BUR kinase complex	232237	Battaglia et al., 2017	GEO: GSE81822
	Bur2		169544	Battaglia et al., 2017	GEO: GSE81822
	Ctk1	CTDK-I coomplex	257668	Battaglia et al., 2017	GEO: GSE81822
	Ctk2		209835	Battaglia et al., 2017	GEO: GSE81822
	Cdc73	PAF1 complex	234224	Battaglia et al., 2017	GEO: GSE81822
	Ctr9		5361	Battaglia et al., 2017	GEO: GSE81822
	Leo1		87202	Battaglia et al., 2017	GEO: GSE81822
	Paf1		72871	Battaglia et al., 2017	GEO: GSE81822
	Rtf1		52570	Battaglia et al., 2017	GEO: GSE81822
	Set1	Histone methyl transferase	321575	Battaglia et al., 2017	GEO: GSE81822
	Set2		90276	Battaglia et al., 2017	GEO: GSE81822
	Dot1		88966	Battaglia et al., 2017	GEO: GSE81822
	Spt5	DSIF	193823	Baejen et al. ,2017	GEO: GSE79222
	Spt6	Nucleosome remodeling	204781	Battaglia et al., 2017	GEO: GSE81822
	Rpb1	RNA polymerase	153593	Baejen et al. ,2017	GEO: GSE79222
Splicing	Ist3	U2 snRNP	3899	Baejen et al., 2014	GEO: ﻿GSE59676
	Nam8	U1 snRNP	7097	Baejen et al., 2014	GEO: ﻿GSE59676
	Mud1		8512	Baejen et al., 2014	GEO: ﻿GSE59676
	Snp1		6773	Baejen et al., 2014	GEO: ﻿GSE59676
	Luc7		33471	Baejen et al., 2014	GEO: ﻿GSE59676
	Mud2	BBP/ U2AF65	76190	Baejen et al., 2014	GEO: ﻿GSE59676
	Msl5		81742	Baejen et al., 2014	GEO: ﻿GSE59676
3' processing	Pab1	Poly(A)	33422	Baejen et al., 2014	GEO: ﻿GSE59676
	Pub1	Poly(U)	72015	Baejen et al., 2014	GEO: ﻿GSE59676
	Rna15	CFIA	92792	Baejen et al., 2014	GEO: ﻿GSE59676
	Mpe1	CPF	3743	Baejen et al., 2014	GEO: ﻿GSE59676
	Cft2		32758	Baejen et al., 2014	GEO: ﻿GSE59676
	Yth1		6506	Baejen et al., 2014	GEO: ﻿GSE59676
Termination	Rat1	Exoribonuclease	122259	Baejen et al. ,2017	GEO: GSE79222
	Rai1		23092	Baejen et al. ,2017	GEO: GSE79222
	Rtt103		51954	Baejen et al. ,2017	GEO: GSE79222
	Pcf11		1432	Baejen et al. ,2017	GEO: GSE79222
Export	Hpr1	THO	24616	Baejen et al., 2014	GEO: ﻿GSE59676
	Tho2		3282	Baejen et al., 2014	GEO: ﻿GSE59676
	Gbp2	TREX	151941	Baejen et al., 2014	GEO: ﻿GSE59676
	Hrb1		132503	Baejen et al., 2014	GEO: ﻿GSE59676
	Mex67		10917	Baejen et al., 2014	GEO: ﻿GSE59676
	Sub2		39981	Baejen et al., 2014	GEO: ﻿GSE59676
	Yra1	Adaptors	46438	Baejen et al., 2014	GEO: ﻿GSE59676
	Nab2		99934	Baejen et al., 2014	GEO: ﻿GSE59676
	Npl3		131428	Baejen et al., 2014	GEO: ﻿GSE59676
